# Supplementary material for: A highly sensitive and room temperature ethanol gas sensor based on spray deposited Sb doped SnO2 thin films
Source: Royal Society of Chemistry journal article supplement (doi:10.1039/d3ma00696d), 2023-12-06
Supplement: d3ma00696d1.pdf [file d3ma00696d1.pdf]

## Supporting Information

### Highly Sensitive and Room Temperature Ethanol Gas Sensor Based on Spray Deposited Sb doped SnO<sub>2</sub> Thin Film

Ramarajan Ramanathan<sup>1</sup>, Selvakumar Nagarajan<sup>2</sup>, Surya Sathiyamoorthy<sup>3</sup>, Balaji Manavaimaran<sup>3</sup>, Harish C. Barshilia<sup>2</sup>, Ramesh Chandra Mallik<sup>1\*</sup>

<sup>1</sup>Department of Physics, Indian Institute of Science (IISc), Bengaluru-560012, India

<sup>2</sup>Surface Engineering Division, CSIR-National Aerospace Laboratories (NAL), Bengaluru-560017, India

<sup>3</sup>Department of Materials Science, University of Madras, Guindy Campus, Chennai-600025, India

Email: [rcmallik@iisc.ac.in](mailto:rcmallik@iisc.ac.in)

#### 1. Gas-sensing measurement setup

The ethanol gas sensing properties of undoped and Sb-doped SnO<sub>2</sub> thin films were tested using an in-house-built gas sensor unit. The pictorial diagram of the in-house-built gas sensor setup is shown in supplementary Figure S1.

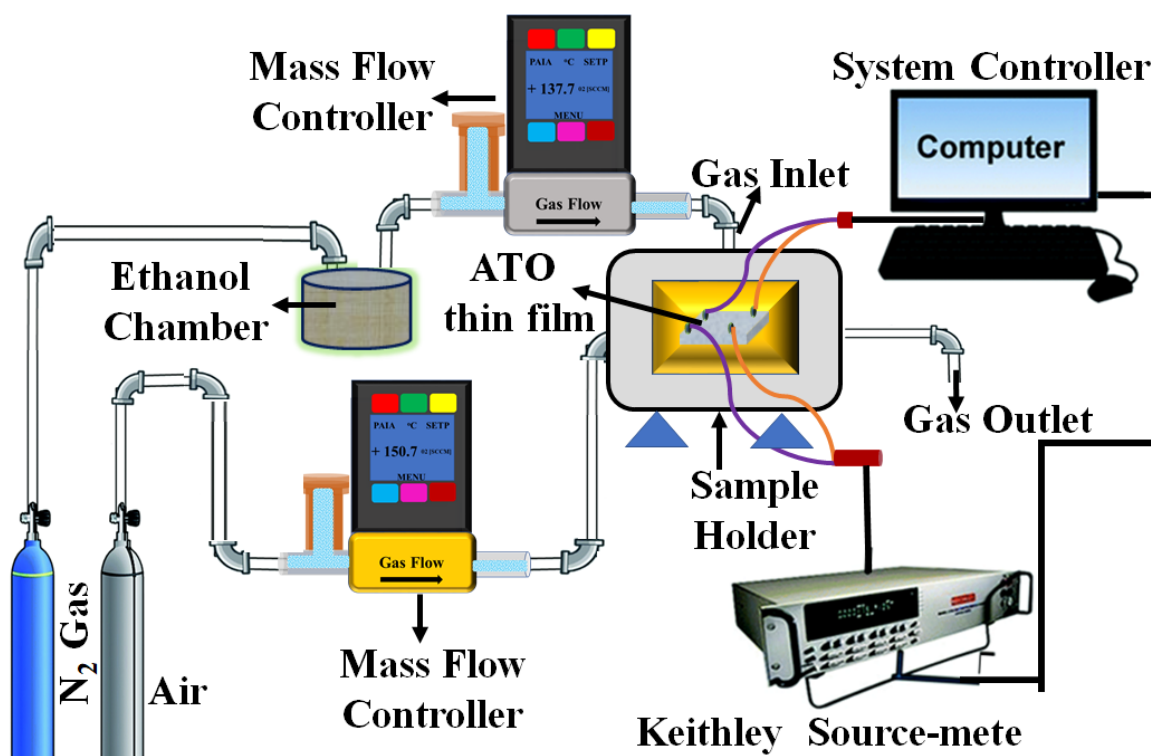

Fig. S1. In-house-built ethanol gas sensor experimental setup.

## 2. Repeatability study of gas-sensing measurements

To confirm the reliability of the sensor, each response study was carried out 3 times. The TO and ATO thin films exhibited similar response behavior toward ethanal gas sensing, as shown in Figure S2.

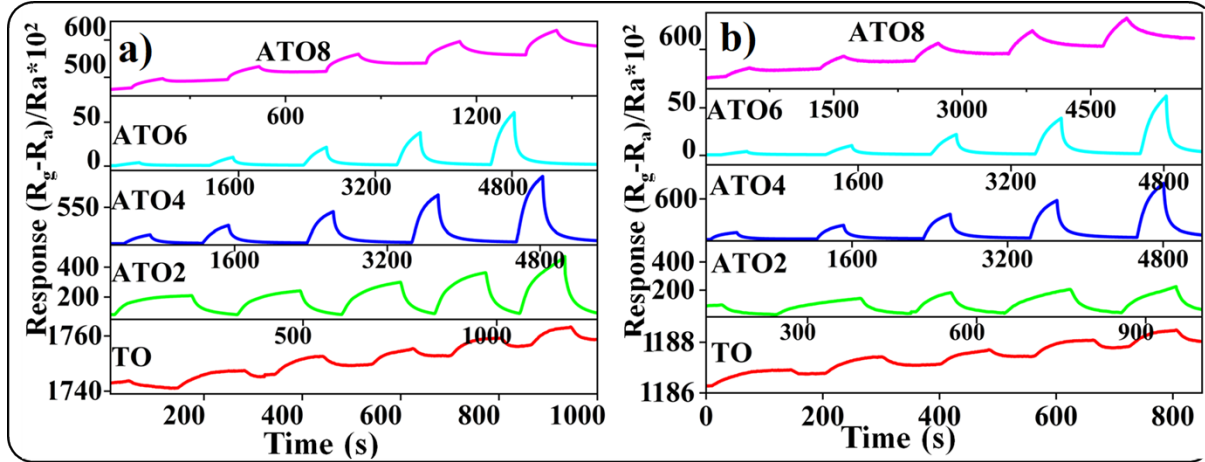

**Fig. S2.** (a, b) Response behavior of TO and ATO thin films towards 10–50 ppm of ethanol gas at 30 °C.

**Table S1.** Ethanol gas sensor performance of TO and ATO films for different Sb doping contents.

| Sample            | Gas (ppm) | TO  | ATO2 | ATO4 | ATO6 | ATO8 |
|-------------------|-----------|-----|------|------|------|------|
| Response time (s) | 10        | 66  | 97   | 190  | 204  | 69   |
|                   | 20        | 85  | 108  | 233  | 213  | 79   |
|                   | 30        | 90  | 132  | 210  | 207  | 86   |
|                   | 40        | 64  | 179  | 243  | 219  | 88   |
|                   | 50        | 79  | 127  | 205  | 259  | 86   |
| Recovery time (s) | 10        | 34  | 70   | 207  | 108  | 42   |
|                   | 20        | 32  | 105  | 279  | 148  | 71   |
|                   | 30        | 33  | 112  | 291  | 157  | 98   |
|                   | 40        | 34  | 135  | 212  | 189  | 110  |
|                   | 50        | 32  | 101  | 263  | 214  | 179  |
| Response (%)      | 10        | 0.2 | 12   | 54   | 235  | 11   |
|                   | 20        | 1.6 | 31   | 83   | 379  | 27   |
|                   | 30        | 2.4 | 47   | 139  | 639  | 33   |
|                   | 40        | 3.8 | 88   | 201  | 715  | 50   |
|                   | 50        | 4.7 | 104  | 296  | 842  | 61   |
| Sensitivity       |           | 0.1 | 2.4  | 6    | 16   | 1.2  |
